# Supplementary material for: Gastroprotective Activities of Ethanol Extract of Black Rice Bran (Oryza sativa L.) in Rats
Source: MDPI journal article supplement (doi:10.3390/molecules26133812), 2021-06-22
Supplement: s1 [file s1]

# Supplementary Materials

## Gastroprotective Activities of Ethanol Extract of Black Rice Bran (*Oryza sativa* L.) in Rats

Peerachit Tonchaiyaphum <sup>1</sup>, Warangkana Arpornchayanon <sup>1</sup>, Parirat Khonsung <sup>1</sup>, Natthakarn Chiranthanut <sup>1</sup>, Pornsiri Pitchakarn <sup>2</sup> and Puongtip Kunanusorn <sup>1,\*</sup>

<sup>1</sup> Department of Pharmacology, Faculty of Medicine, Chiang Mai University, Chiang Mai 50200, Thailand; tpeerachit@gmail.com (P.T.); warangkana.arporn@elearning.cmu.ac.th (W.A.); wparirat@yahoo.com (P.K.); cnatthak@gmail.com (N.C.)

<sup>2</sup> Department of Biochemistry, Faculty of Medicine, Chiang Mai University, Chiang Mai 50200, Thailand; pornsiri.p@cmu.ac.th

\* Correspondence: puongtip.k@cmu.ac.th; Tel.: +66-53-935-353

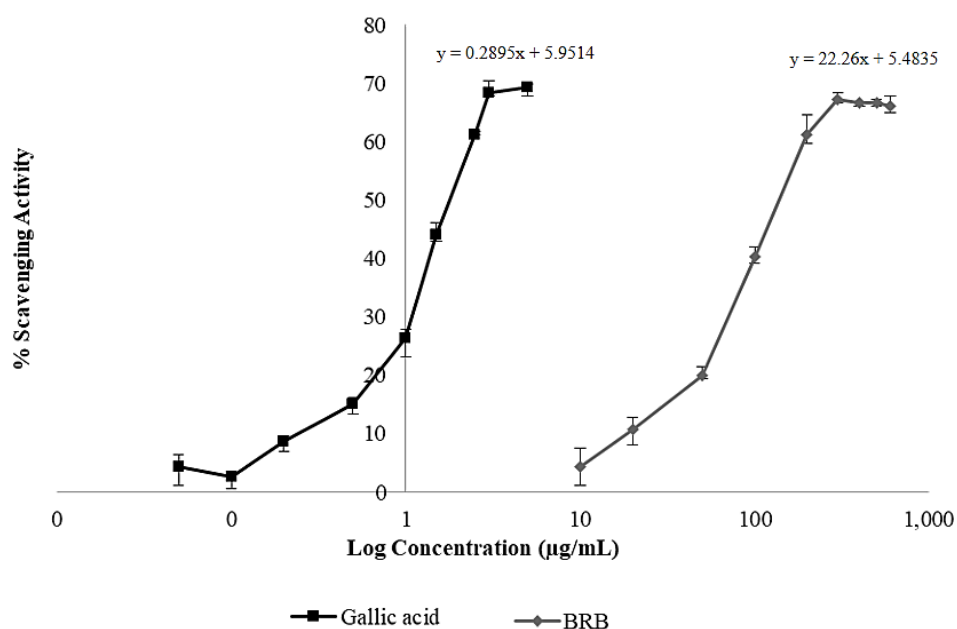

**Figure S1.** The log concentrations and % DPPH radical scavenging activities of ethanol extract of BRB and gallic acid.
